# Supplementary material for: Factors contributing to inequality in access to urban health service delivery in low resource setting country
Source: Research Square preprint supplement (doi:10.21203/rs.3.rs-344996/v1), 2021-03-24
Supplement: Supplementary file 1 [file 709be2925cbaed1eb5704217.docx]

**Chart 1: Overall Factors affecting Health Service Accessibility**

Source: Survey Data, 2019
